# Supplementary material for: Novel Haplotypes of genetic polymorphisms in alcohol metabolizing enzymes in Kampala, Uganda
Source: Research Square preprint supplement (doi:10.21203/rs.3.rs-5955120/v1), 2025-04-14
Supplement: Supplementary file 1 [file 0a6da898dd0d01a1a8bbe9e6.xlsx]

## Sheet: Sheet1
	Supplementary Table 1: Comparison of the ADH1B rs1229984 polymorphism frequency in the Uganda population with other populations
	Population		N	ADH1B rs1229984 Genotype frequencies						P-value*	ADH1B rs1229984 Allele frequencies				P-value*
				G/G		G/A		A/A			G (Arg)		A (His)
				n	%	n	%	n	%		n	%	n	%
	Ugandan (present study)		250	249	99.6	1	0.4	0	0	ref	499	99.8	1	0.2	ref
	World (Yates et al., 2020)		2504	1959	78.2	296	11.8	249	9.9	0	4214	84.2	794	15.6	0
	African (Yates et al., 2020)		661	659	99.7	2	0.3	0	0	0.819	1320	99.8	2	0.2	0.819
	African Caribbean in Barbados (ACB)(Yates et al., 2020)		96	94	97.9	2	2.1	0	0	0.187	190	99	2	1	0.188
	African ancestry in Southwest US (ASW)(Yates et al., 2020)		61	61	100	0	0	0	0	1	122	100	0	0	1
	Esan in Nigeria (ESN)(Yates et al., 2020)		99	99	100	0	0	0	0	1	198	100	0	0	1
	Gambian in Western Division, The Gambia (GWD)(Yates et al., 2020)		113	113	100	0	0	0	0	1	226	100	0	0	1
	Luhya in Webuye, Kenya (LWK)(Yates et al., 2020)		99	99	100	0	0	0	0	1	198	100	0	0	1
	Mende in Sierra Leone (MSL)		85	85	100	0	0	0	0	1	170	100	0	0	1
	Yoruba in Ibadan, Nigeria (YRI)(Yates et al., 2020)		108	108	100	0	0	0	0	1	216	100	0	0	1
	Turkish (Kayaaltı & Söylemezoğlu, 2010)		211	177	83.9	34	16.1	0	0	0	388	91.9	34	8.1	0
	Japanese (Tamakoshi et al., 2003)		452	19	4.2	149	33	284	62.8	0	187	20.7	717	79.3	0
	Brazilian (Wolf et al., 2017)		365	328	89.9	37	10.1	0	0	0	693	94.9	37	5.1	0
	Indian (Vaswani et al., 2009)		174	173	99.4	1	0.6	0	0	0.796	347	99.9	1	0.1	0.796
	Turkish (Vatansever et al., 2015)		237	225	94.9	11	4.6	1	0.4	0.006	461	97.3	13	2.7	0.001
	Japanese (Avinçsal et al., 2018)		85	14	16.2	50	58.1	21	24.4	0	78	45.9	92	54.1	0
	Taiwanese (Chien et al., 2019)		1069	110	10.3	404	37.8	555	51.9	0	624	29.2	1514	70.8	0
	Chinese (Jin et al., 2016)		100	45	45	44	44	11	11	0	134	67	66	33	0
	Indian (Ghosh et al., 2017)		213	211	99.1	2	0.9	0	0	0.471	424	99.5	2	0.5	0.472
	Spanish (Bediaga et al., 2015)		326	281	86.2	45	13.8	0	0	0	607	93.1	45	6.9	0
	Czech (Hubáček et al., 2018)		571	495	86.7	76	13.3	0	0	0	1066	93.3	76	6.7	0
	Czech (Hubacek et al., 2018)		833	773	92.8	58	7	0	0	0	1604	96.3	62	3.7	0
	Chinese (Wang et al., 2014)		1365	656	48.1	570	41.8	139	10.1	0	1882	68.9	848	31.1	0
	Greek (Katsarou et al., 2017)		1276	844	66.1	381	29.9	51	4	0	2069	81.1	483	18.9	0
	Polish (Fang et al., 2007)		694	613	88.3	79	11.4	2	0.3	< .00001	1305	94	83	6	0
	Spanish (Jiménez-Jiménez et al., 2017)		710	596	83.9	106	14.9	8	1.2	0	1298	91.4	122	8.6	0
	Chinese (Zhang et al., 2014)		100	48	48	45	45	7	7	0	141	70.5	59	29.5	0
	Hungarian (Tóth et al., 2011)		907	774	85.3	131	14.4	2	0.2	< .00001	1679	92.6	135	7.4	0
