# Supplementary material for: Novel Haplotypes of genetic polymorphisms in alcohol metabolizing enzymes in Kampala, Uganda
Source: Research Square preprint supplement (doi:10.21203/rs.3.rs-5955120/v1), 2025-04-14
Supplement: Supplementary file 2 [file 1b1b34d4aeb314185831924b.xlsx]

## Sheet: Sheet1
	Supplementary Table 3: Comparison of the ADH1C rs1693482 polymorphism frequency in the Uganda population with other populations
	Population		N	ADH1C rs1693482						P-value*	ADH1C rs1693482Allele frequencies				P-value*
				Genotype frequencies
				G/G		G/A		A/A			G (Arg)		A (Gln)
				n	%	n	%	n	%		n	%	n	%
	Ugandan (Present study)		250	202	80.8	43	17.2	5	2	ref	447	89.4	53	10.6	ref
	World (Yates et al., 2020)		2504	1597	63.8	166	6.6	741	29.6	0	3935	78.6	1073	21.4	0
	African (Yates et al., 2020)		661	535	80.9	120	0.9	6	18.2	0	1190	90	132	10	0.698
	African Caribbean in Barbados (ACB)(Yates et al., 2020)		96	77	80.2	17	17.7	2	2.1	0.992	171	89.1	21	10.9	0.891
	African ancestry in Southwest US (ASW)(Yates et al., 2020)		61	46	75.4	13	21.3	2	3.3	0.608	105	86.1	17	13.9	0.337
	Esan in Nigeria (ESN)(Yates et al., 2020)		99	86	86.9	12	12.1	1	1	0.39	184	92.9	14	7.1	0.199
	Gambian in Western Division, The Gambia (GWD)(Yates et al., 2020)		113	93	82.3	20	17.7	0	0	0.318	206	91.2	20	8.8	0.508
	Luhya in Webuye, Kenya (LWK)(Yates et al., 2020)		99	72	72.7	26	26.3	1	1	0.139	170	85.9	28	14.1	0.192
	Mende in Sierra Leone (MSL)(Yates et al., 2020)		85	69	81.2	16	18.8	0	0	0.407	154	90.6	16	9.4	0.771
	Yoruba in Ibadan, Nigeria (YRI)(Yates et al., 2020)		108	92	85.2	16	14.8	0	0	0.273	200	92.6	16	7.4	0.215
	Brazilian (Wolf et al., 2017)		365	190	52	144	39.5	31	8.5	0	524	71.8	206	28.2	0
	Polish (Cichoz-Lach et al., 2008)		141	134	95	7	5	0	0	0	275	97.5	7	2.5	0
	Spanish (Bediaga et al., 2015)		326	128	39.3	157	48.1	41	12.6	0	413	63.3	239	36.7	0
	Chinese (Wang et al., 2014)		1365	1316	96.4	47	3.4	2	0.2	0	2679	98.1	51	1.9	0
	Greek (Katsarou et al., 2017)		1276	733	57.4	469	36.8	74	5.8	0	1935	75.8	617	24.8	0
	Polish (Fang et al., 2007)		676	110	16.3	342	50.6	224	33.1	0	562	41.6	790	58.4	0
	Hungarian (Tóth et al., 2011)		907	334	36.8	443	48.8	130	14.3	0	1111	61.3	703	38.7	0
	Spanish (Martínez et al., 2010)		250	100	40	112	44.8	38	15.2	0	312	62.4	188	37.6	0
	American (Djoussé et al., 2005)		1736	696	40.1	752	43.3	288	16.6	0	2144	61.8	1328	38.2	0
	French (Bonaventure et al., 2013)		1496	572	38.2	676	45.2	248	16.6	0	1820	60.8	1172	39.2	0
	Abbreviation: Ref: Reference study
