# Supplementary material for: Novel Haplotypes of genetic polymorphisms in alcohol metabolizing enzymes in Kampala, Uganda
Source: Research Square preprint supplement (doi:10.21203/rs.3.rs-5955120/v1), 2025-04-14
Supplement: Supplementary file 3 [file 98e0af615b8f7fb45764a005.xlsx]

## Sheet: Sheet1
	Supplementary Table 5: Comparison of the ALDH2 rs671 polymorphism frequency in the Uganda population with other populations in the world
	Population		N	ALDH2 rs671						P-value*	ALDH2 rs671 Allele frequencies				P-value*
				Genotype frequencies
				G/G		G/A		A/A			G		A
				n	%	n	%	n	%		n	%	n	%
	Ugandan (Present study)		250	250	100	0	0	0	0	ref	500	100	0	0	ref
	World (Yates et al., 2020)		2504	2345	93.7	139	5.6	20	0.8	0	4829	96.4	179	3.6	0
	African (Yates et al., 2020)		661	659	99.7	2	0.3	0	0	0.384	1320	99.8	2	0.2	0.384
	African Caribbean in Barbados (ACB)(Yates et al., 2020)		96	95	99	1	1	0	0	0.278	191	99.5	1	0.5	0.278
	African ancestry in Southwest US (ASW)(Yates et al., 2020)		61	61	100	0	0	0	0	1	122	100	0	0	1
	Esan in Nigeria (ESN)(Yates et al., 2020)		99	99	100	0	0	0	0	1	198	100	0	0	1
	Gambian in Western Division, The Gambia (GWD)(Yates et al., 2020)		113	112	99.1	1	0.9	0	0	0.311	225	99.6	1	0.4	0.311
	Luhya in Webuye, Kenya (LWK)(Yates et al., 2020)		99	99	100	0	0	0	0	1	198	100	0	0	1
	Mende in Sierra Leone (MSL)(Yates et al., 2020)		85	85	100	0	0	0	0	1	170	100	0	0	1
	Yoruba in Ibadan, Nigeria (YRI)(Yates et al., 2020)		108	108	100	0	0	0	0	1	216	100	0	0	1
	Turkish (Kayaaltı & Söylemezoğlu, 2010)		211	211	100	0	0	0	0	1	422	100	0	0	1
	Japanese (Tamakoshi et al., 2003)		453	221	48.8	187	41.3	45	9.9	0	629	69.4	277	30.6	0
	Indian (Vaswani et al., 2009)		174	128	73	27	16	19	11	0	283	81.3	65	18.7	0
	Turkish (Vatansever et al., 2015)		222	222	100	0	0	0	0	1	444	100	0	0	1
	Polish (Cichoz-Lach et al., 2008)		141	141	100	0	0	0	0	1	282	100	0	0	1
	Japanese (Avinçsal et al., 2018)		85	35	40.6	42	48.8	8	9.3	0	112	65.9	58	34.1	0
	Taiwanese (Chien et al., 2019)		1069	474	44.3	525	49.1	70	6.6	0	1473	68.9	665	31.1	0
	Indian (Ghosh et al., 2017)		213	192	90.2	19	8.9	2	0.9	0	403	94.6	23	5.4	0
	Czech (Hubacek et al., 2018)		835	571	68.4	238	28.5	26	3.1	0	1380	82.6	290	17.4	0
	Chinese (Wang et al., 2014)		1365	691	50.6	517	37.9	157	11.5	0	1899	69.6	831	30.4	0
	Greek (Katsarou et al., 2017)		1276	1274	99.8	2	0.2	0	0	0.531	2550	99.9	2	0.1	0 .531
	Spanish (Martínez et al., 2010)		250	250	100	0	0	0	0	1	500	100	0	0	1
