# Supplementary material for: Novel Haplotypes of genetic polymorphisms in alcohol metabolizing enzymes in Kampala, Uganda
Source: Research Square preprint supplement (doi:10.21203/rs.3.rs-5955120/v1), 2025-04-14
Supplement: Supplementary file 4 [file be5127efd96842d3d71ac693.xlsx]

## Sheet: Sheet1
	Supplementary Table 4: Comparison of the ADH1C rs698 polymorphism frequency in the Uganda population with other populations
	Population		N	ADH1C rs698						P-value*	ADH1C rs698				P-value*
				Genotype frequencies							Allele frequencies
				A/A		A/G		G/G			A (Ile)		G (Val)
				n	%	n	%	n	%		n	%	n	%
	Ugandan (Present study)		250	3	1.2	242	96.8	5	2	ref	248	49.6	252	50.4	ref
	World (Yates et al., 2020)		2504	1597	63.8	741	29.6	166	6.6	0	3935	78.6	1073	21.4	0
	African (Yates et al., 2020)		661	536	81.1	119	18	6	0.9	0	1191	90.1	131	9.9	0
	African Caribbean in Barbados (ACB)(Yates et al., 2020)		96	77	80.2	17	17.7	2	2.1	0	171	89.1	21	10.9	0
	African ancestry in Southwest US (ASW)(Yates et al., 2020)		61	46	75.4	13	21.3	2	3.3	0	105	86.1	17	13.9	0
	Esan in Nigeria (ESN)(Yates et al., 2020)		99	86	86.9	12	12.1	1	1	0	184	92.9	14	7.1	0
	Gambian in Western Division, The Gambia (GWD)(Yates et al., 2020)		113	93	82.3	20	17.7	0	0	0	206	91.2	20	8.8	0
	Luhya in Webuye, Kenya (LWK)(Yates et al., 2020)		99	72	72.7	26	26.3	1	1	0	170	85.9	28	14.1	0
	Mende in Sierra Leone (MSL)(Yates et al., 2020)		85	69	81.2	16	18.8	0	0	0	154	90.6	16	9.4	0
	Yoruba in Ibadan, Nigeria (YRI)(Yates et al., 2020)		108	93	86.1	15	13.9	0	0	0	201	93.1	15	6.9	0
	Brazilian (Wolf et al., 2017)		365	190	52	144	39.5	31	8.5	0	524	71.8	206	28.2	0
	Turkish (Vatansever et al., 2015)		221	26	11.8	137	62	58	26.2	0	189	42.8	253	57.2	0.036
	Polish (Cichoz-Lach et al., 2008)		141	44	31.2	67	47.5	30	21.3	0	155	55	127	45	0.149
	Indian (Dutta, 2013)		220	93	42.3	106	48.2	21	9.5	0	292	66.4	148	33.6	0
	Taiwanese (Chien et al., 2019)		1069	870	81.4	185	17.3	14	1.3	0	1925	90	213	10	0
	Chinese (Jin et al., 2016)		99	67	67.7	25	25.3	7	7.1	0	159	80.3	39	19.7	0
	Indian (Ghosh et al., 2017)		213	121	56.8	75	35.2	17	8	0	317	74.4	109	25.6	0
	Spanish (Bediaga et al., 2015)		326	127	39	160	49	39	12	0	414	63.5	238	36.5	0
	Polish (Fang et al., 2007)		722	118	16.3	370	51.3	234	32.4	0	606	42	838	58	0.003
	Chinese (Zhang et al., 2014)		100	44	44	46	46	10	10	0	134	67	66	33	0
	Hungarian (Tóth et al., 2011)		907	334	36.8	443	48.8	130	14.3	0	1111	61.3	703	38.7	0
	Spanish (Martínez et al., 2010)		250	92	36.8	123	49.2	35	14	0	307	61.4	193	38.6	0
	American (Djoussé et al., 2005)		1759	685	38.9	781	44.4	293	16.7	0	2151	61.1	1367	38.9	0
	French (Bonaventure et al., 2013)		1492	572	38.3	674	45.2	246	16.5	0	1818	60.9	1166	39.1	0
