# Supplementary material for: Novel Haplotypes of genetic polymorphisms in alcohol metabolizing enzymes in Kampala, Uganda
Source: Research Square preprint supplement (doi:10.21203/rs.3.rs-5955120/v1), 2025-04-14
Supplement: Supplementary file 5 [file db01cf19e0a7b6f0d8194c53.xlsx]

## Sheet: Sheet1
	Supplementary Table 2: Comparison of the ADH1B rs2066702 polymorphism frequency in the Uganda population with other populations
	Population		N	ADH1B rs2066702 Genotype frequencies						P-value*	ADH1B rs2066702 Allele frequencies				P-value*
				C/C		C/T		T/T			C (Arg)		T (Cys)
				n	%	n	%	n	%		n	%	n	%
	Ugandan (Present study)		250	164	65.6	81	32.4	5	2	ref	409	81.8	91	18.2	ref
	World (Yates et al., 2020)		2504	2265	90.5	212	8.5	27	1.1	0	4742	94.7	266	5.3	0
	African (Yates et al., 2020)		661	436	66	198	30	27	4.1	0.272	1070	80.9	252	19.1	0.674
	African Caribbean in Barbados (ACB)(Yates et al., 2020)		96	66	68.8	23	24	7	7.3	0.025	155	80.7	37	19.3	0.744
	African ancestry in Southwest US (ASW)(Yates et al., 2020)		61	39	63.9	19	31.1	3	4.9	0.434	97	79.5	25	20.5	0.604
	Esan in Nigeria (ESN)(Yates et al., 2020)		99	51	51.5	42	42.4	6	6.1	0.018	144	72.7	54	27.3	0.009
	Gambian in Western Division, The Gambia (GWD)(Yates et al., 2020)		113	85	75.2	24	21.2	4	3.5	0.076	194	85.8	32	14.2	0.2
	Luhya in Webuye, Kenya (LWK)(Yates et al., 2020)		99	71	71.7	28	28.3	0	0	0.252	170	85.9	28	14.1	0.22
	Mende in Sierra Leone (MSL)(Yates et al., 2020)		85	71	83.5	13	15.3	1	1.2	0.008	155	91.2	15	8.8	0.003
	Yoruba in Ibadan, Nigeria (YRI)(Yates et al., 2020)		108	53	49.1	49	45.4	6	5.6	0.007	155	71.8	61	28.2	0.004
	Brazilian (Wolf et al., 2017)		365	346	94.8	19	5.2	0	0	0	711	97.4	19	2.6	0
	Indian (Dutta, 2013)		220	215	97.7	5	2.3	0	0	0	435	98.9	5	1.1	0
	Chinese (Jin et al., 2016)		100	100	100	0	0	0	0	0	200	100	0	0	0
	Indian (Ghosh et al., 2017)		213	213	100	0	0	0	0	0	426	100	0	0	0
	Polish (Fang et al., 2007)		706	706	100	0	0	0	0	0	1412	100	0	0	0
	Chinese (Zhang et al., 2014)		100	95	95	5	5	0	0	0	195	97.5	5	2.5	0
	Hungarian (Tóth et al., 2011)		907	905	99.8	2	0.2	0	0	0	1812	99.9	2	0.1	0
	Spanish (Martínez et al., 2010)		250	250	100	0	0	0	0	0	500	100	0	0	0
